# Supplementary material for: LDLR-Mediated Targeting and Productive Uptake of siRNA-Peptide Ligand Conjugates In Vitro and In Vivo
Source: MDPI journal article supplement (doi:10.3390/pharmaceutics16040548), 2024-04-17
Supplement: s1 [file s1]

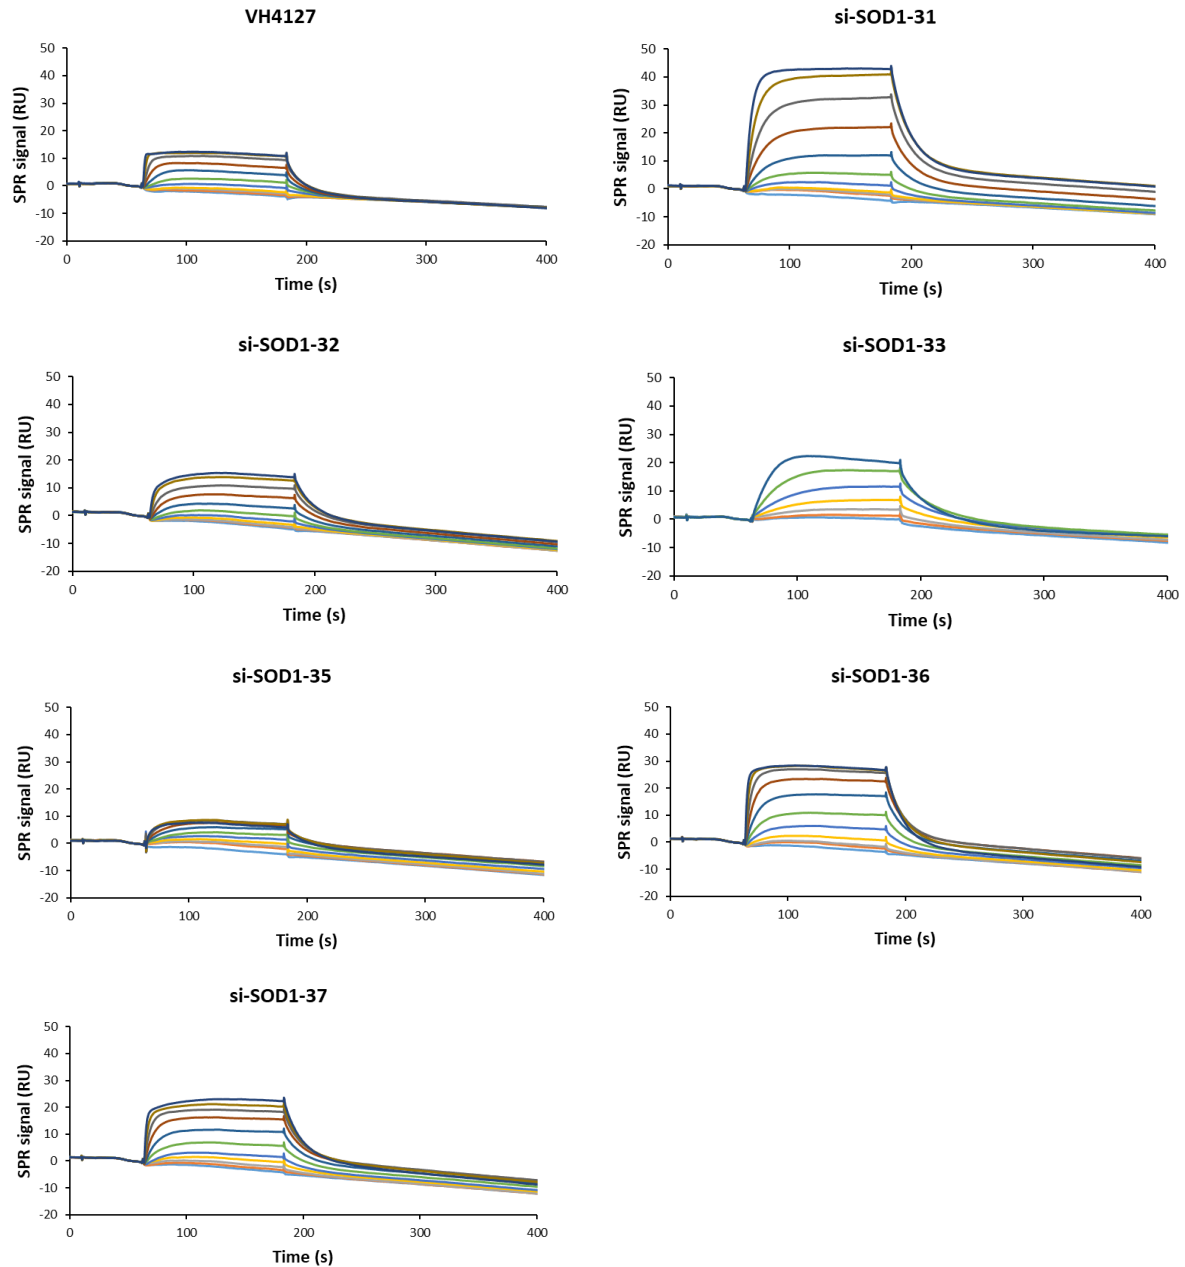

**Supplemental Figure S1: Evaluation by SPR of VH4127 peptide and conjugate binding to LDLR.** Increasing concentrations of VH4127 peptide or conjugates (0.6-640 nM excepted for si-SOD1-33 0.6-40 nM) were injected over LDLR immobilized on Ni sensor chip. Typical sensorgrams are displayed. Each figure is representative of two independent experiments.
