# Supplementary figures and images for: LDLR-Mediated Targeting and Productive Uptake of siRNA-Peptide Ligand Conjugates In Vitro and In Vivo
Source: MDPI journal article supplement (doi:10.3390/pharmaceutics16040548), 2024-04-17

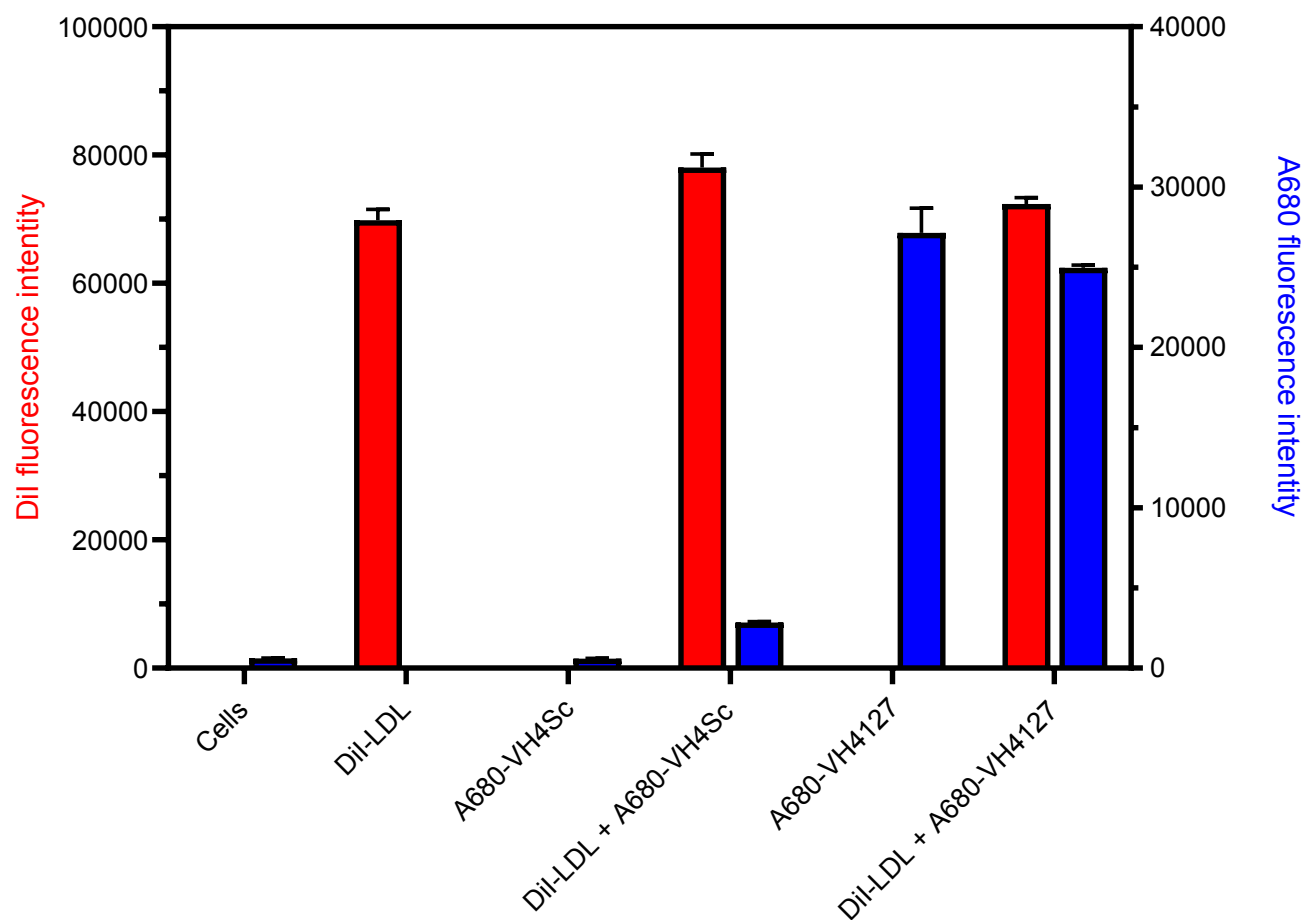

**Supplemental Figure S2:** Validation of LDLR-expression and VH4127 binding in the Neuro-2a cell line

Supplement: s1 [file s1]
